# Supplementary material for: Comparative pharmacokinetics of oxyresveratrol alone and in combination with piperine as a bioenhancer in rats
Source: Springer Nature journal article supplement (doi:10.1186/s12906-019-2653-y), 2019-09-02
Supplement: MOESM1 [file 17129848]

## **Additional material**

### **Comparative pharmacokinetics of oxyresveratrol alone and in combination with piperine as a bioenhancer in rats**

Dhirarin Junsang <sup>1\*</sup>, Tosapol Anukunwithaya <sup>1\*</sup>, Phanit Songvut <sup>1</sup>, Boonchoo Sritularak <sup>2</sup>, Kittisak Likhitwitayawuid <sup>2</sup>, Phisit Khemawoot <sup>3,4</sup>

#### **Affiliations**

<sup>1</sup> Department of Pharmacology and Physiology, Faculty of Pharmaceutical Sciences, Chulalongkorn University, Bangkok, Thailand

<sup>2</sup> Department of Pharmacognosy and Pharmaceutical Botany, Faculty of Pharmaceutical Sciences, Chulalongkorn University, Bangkok, Thailand

<sup>3</sup> Department of Biochemistry and Microbiology, Faculty of Pharmaceutical Sciences, Chulalongkorn University, Bangkok, Thailand

<sup>4</sup> Preclinical Pharmacokinetics and Interspecies Scaling for Drug Development Research Unit, Chulalongkorn University, Bangkok, Thailand

#### **Correspondence**

Phisit Khemawoot, Ph.D.

Department of Biochemistry and Microbiology, Faculty of Pharmaceutical Sciences, Chulalongkorn University, Bangkok, Thailand 10330

E-mail: [phisit.k@chula.ac.th](mailto:phisit.k@chula.ac.th); Phone: +66 22188378

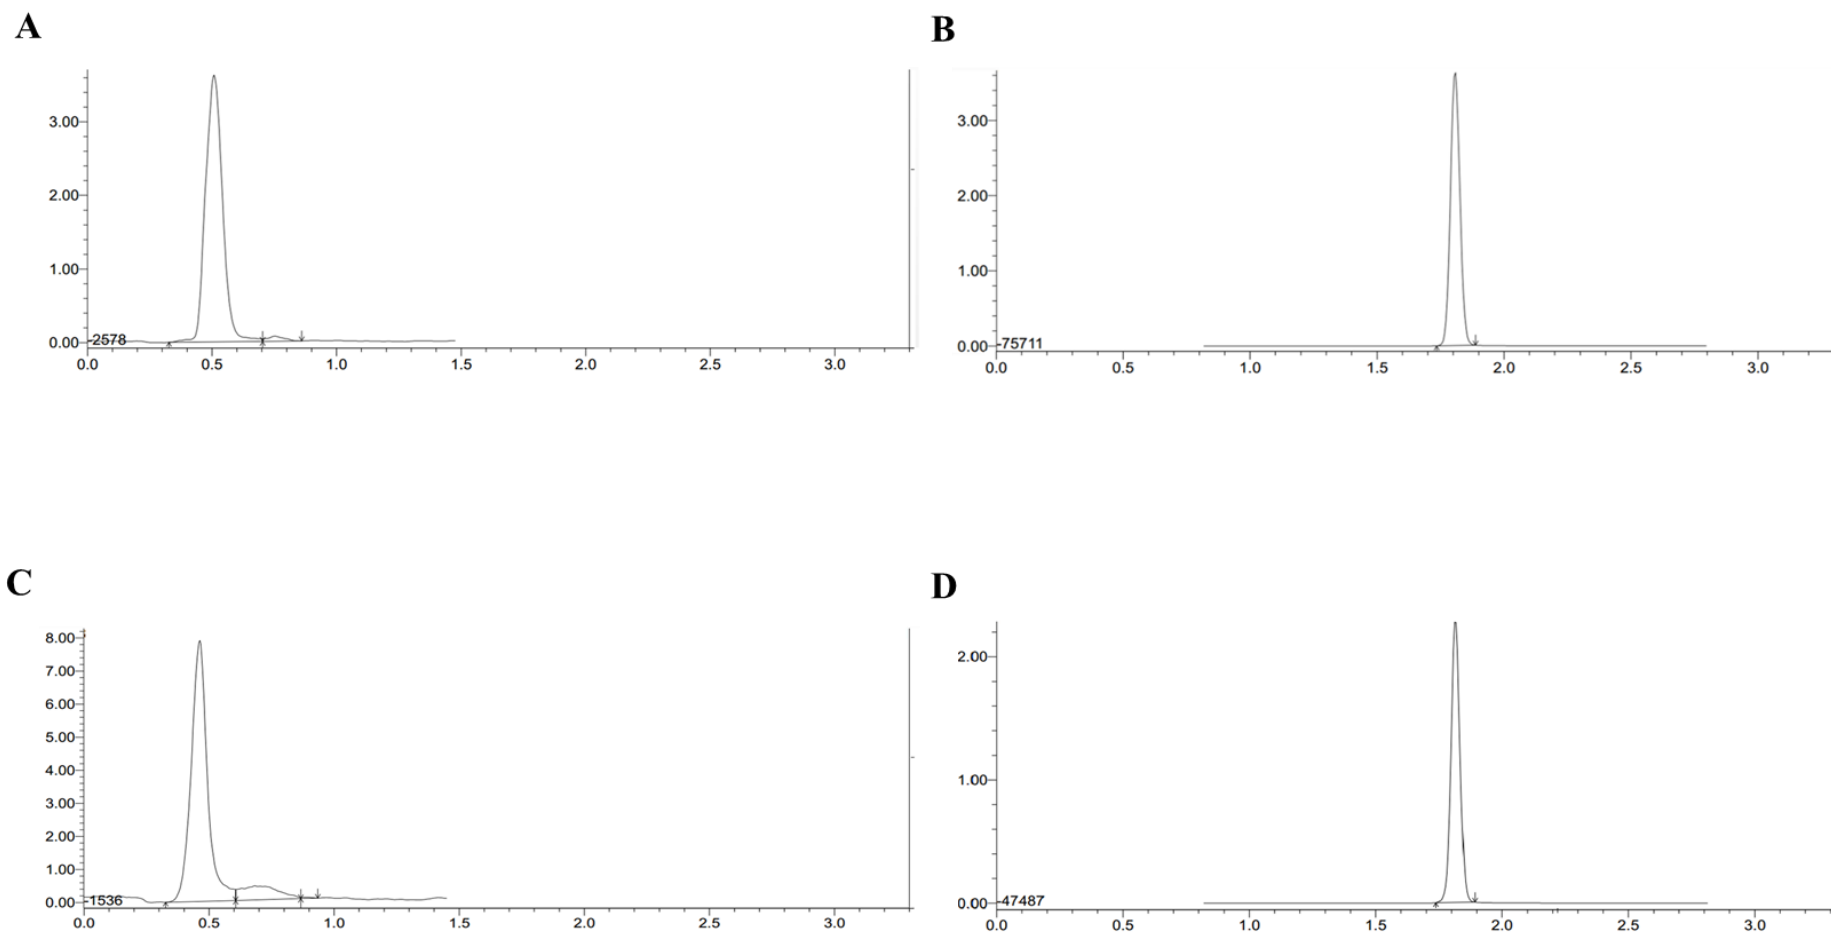

**Figure 1S** LC–MS/MS chromatograms. Blank plasma spiked with 250 ng/mL oxyresveratrol (A); Blank plasma spiked with 25 ng/mL piperine (B); Plasma sample collected from rat at 1 h after intravenous administration of oxyresveratrol 10 mg/kg (C); Plasma sample collected from rat at 1 h after intravenous administration of piperine 1 mg/kg (D).

**Table 1S** The precision and accuracy for oxyresveratrol determined by LC–MS/MS.

| QC concentration<br>(ng/mL) | Precision (%CV) |               | Accuracy (%RE) |               |
|-----------------------------|-----------------|---------------|----------------|---------------|
|                             | Within–batch    | Between–batch | Within–batch   | Between–batch |
| 10                          | 7.12            | 9.75          | –5.30          | –6.94         |
| 100                         | 2.25            | 3.11          | –3.71          | –4.63         |
| 400                         | 1.09            | 2.03          | –14.34         | –13.39        |

CV, coefficient of variation; RE, relative error.

**Table 2S** The recovery of oxyresveratrol after extraction from rat plasma.

| Concentration of OXY<br>(ng/mL) |            | Mean   | SD    | %CV   | Absolute Recovery |
|---------------------------------|------------|--------|-------|-------|-------------------|
| LQC 10 ng/mL                    | Un-extract | 9.59   | 1.64  | 17.11 | 104.57            |
|                                 | Extract    | 10.02  | 1.15  | 11.49 |                   |
| MQC 100 ng/mL                   | Un-extract | 108.14 | 2.88  | 2.66  | 88.74             |
|                                 | Extract    | 95.96  | 1.60  | 1.67  |                   |
| HQC 400 ng/mL                   | Un-extract | 393.02 | 11.53 | 2.93  | 90.43             |
|                                 | Extract    | 355.42 | 7.60  | 2.14  |                   |

LQC, low concentration quality control; MQC, medium concentration quality control; HQC high concentration quality control; CV, coefficient of variation

**Table 3S** The stability of oxyresveratrol at different storage conditions

| Conditions              | QC concentration (ng/mL) | Measured Value (ng/mL) | SD    | %CV   | %RE   | %Recovery |
|-------------------------|--------------------------|------------------------|-------|-------|-------|-----------|
| Room temperature (12 h) | 10                       | 6.35                   | 0.26  | 4.11  | 36.51 | 63.49     |
|                         | 100                      | 73.50                  | 1.70  | 2.31  | 26.50 | 73.50     |
|                         | 400                      | 272.61                 | 6.39  | 2.34  | 31.85 | 68.15     |
| Autosampler             | 10                       | 8.77                   | 1.09  | 12.44 | 12.31 | 87.69     |
|                         | 100                      | 92.60                  | 1.86  | 2.01  | 7.40  | 92.60     |
|                         | 400                      | 345.41                 | 5.06  | 1.46  | 13.65 | 86.35     |
| Three Freez–thaw cycles | 10                       | 5.87                   | 0.69  | 11.79 | 41.26 | 58.75     |
|                         | 100                      | 72.84                  | 3.62  | 4.98  | 27.16 | 72.84     |
|                         | 400                      | 281.73                 | 10.00 | 3.55  | 29.57 | 70.43     |
| Storage at –20°C (30 d) | 10                       | 7.24                   | 0.85  | 11.77 | 27.60 | 72.41     |
|                         | 100                      | 85.78                  | 3.94  | 4.59  | 14.22 | 85.78     |
|                         | 400                      | 324.47                 | 17.08 | 5.26  | 18.88 | 81.12     |

QC, Quality control; CV, coefficient of variation; RE, relative error.
